# Supplementary material
Source: PubMed Central journal article supplement (PMC3624859)

**A**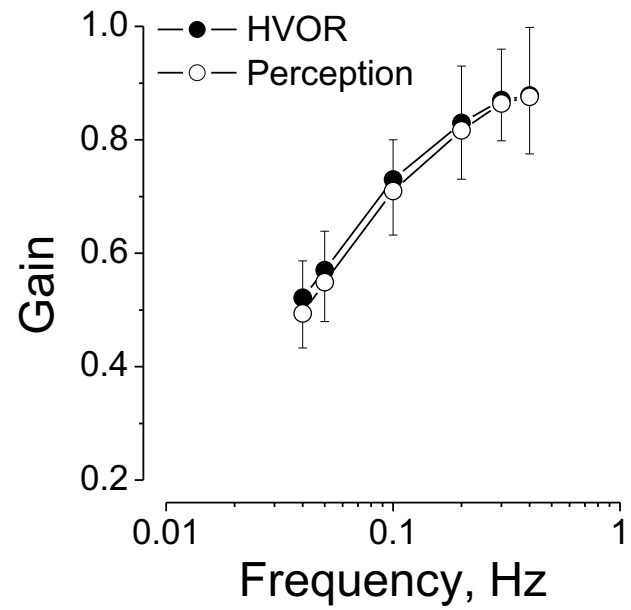**B**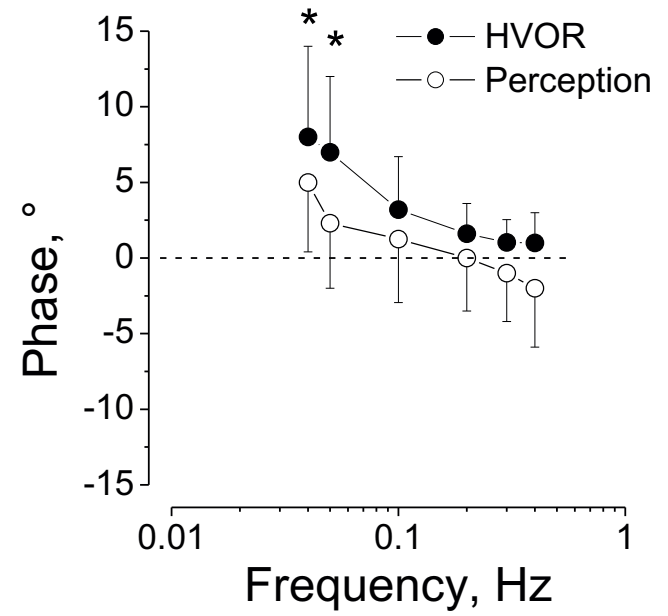

Supplement: tjp0591-1907-SD1.pdf [file tjp0591-1907-SD1.pdf]
